# Supplementary material for: Care Management and Survival of Patients Diagnosed with Synchronous Metastatic Colorectal Cancer: A High-Resolution Population-Based Study in Two French Areas
Source: MDPI journal article supplement (doi:10.3390/cancers14071777), 2022-03-31
Supplement: s1 [file s1]

**Table S1. Hazard ratio with 95% confidence limits from Cox proportional hazards models in the group 4 (*n* = 1159) on non imputed data.**

|                   |           | M0  |            |      | M1           |         |      |              |         |
|-------------------|-----------|-----|------------|------|--------------|---------|------|--------------|---------|
| Characteristic    |           | N   | Deaths (N) | HR   | 95% CI       | P value | HR   | 95% CI       | P value |
| Treatment first   |           |     |            |      |              |         |      |              |         |
|                   | PTR       | 899 | 674        | 1    | Ref          | 0.50    | 1    | Ref          | 0.61    |
|                   | CT        | 260 | 173        | 0.95 | 0.80 to 1.11 |         | 1.05 | 0.87 to 1.26 |         |
| Sex               |           |     |            |      |              |         |      |              |         |
|                   | Men       | 677 | 577        | 1    | Ref          | 0.36    |      |              |         |
|                   | Women     | 482 | 424        | 1.07 | 0.93 to 1.22 |         |      |              |         |
| Age (years)       |           |     |            |      |              |         |      |              |         |
|                   | <60       | 327 | 268        | 1    | Ref          | <0.001  | 1    | Ref          | <0.001  |
|                   | 60-69     | 367 | 305        | 1.12 | 0.93 to 1.34 |         | 1.08 | 0.89 to 1.31 |         |
|                   | 70-79     | 359 | 326        | 1.66 | 1.39 to 1.98 |         | 1.41 | 1.13 to 1.75 |         |
|                   | >= 80     | 106 | 102        | 2.37 | 1.86 to 3.00 |         | 2.06 | 1.56 to 2.70 |         |
| Year of diagnosis |           |     |            |      |              |         |      |              |         |
|                   | 2006-2008 | 322 | 269        | 1    | Ref          | 0.04    | 1    | Ref          | 0.11    |
|                   | 2009-2012 | 414 | 324        | 0.85 | 0.73 to 1.00 |         | 0.84 | 0.71 to 1.00 |         |
|                   | 2013-2016 | 423 | 408        | 0.81 | 0.68 to 0.96 |         | 0.85 | 0.71 to 1.02 |         |
| Departement       |           |     |            |      |              |         |      |              |         |
|                   | Calvados  | 441 | 371        | 1    | Ref          | 0.27    |      |              |         |
|                   | Finistere | 718 | 630        | 1.08 | 0.94 to 1.24 |         |      |              |         |

**Charlson comorbidity index**

|        |     |     |      |              |                  |      |              |             |
|--------|-----|-----|------|--------------|------------------|------|--------------|-------------|
| 0      | 306 | 253 | 1    | Ref          | <b>&lt;0.001</b> | 1    | Ref          | <b>0.01</b> |
| 1 ou 2 | 369 | 300 | 0.99 | 0.83 to 1.19 |                  | 1.02 | 0.84 to 1.23 |             |
| >2     | 390 | 364 | 1.59 | 1.34 to 1.90 |                  | 1.32 | 1.08 to 1.60 |             |

**Localisation of primary tumor**

|        |     |     |      |              |      |  |  |  |
|--------|-----|-----|------|--------------|------|--|--|--|
| colic  | 937 | 811 | 1    | Ref          | 0.47 |  |  |  |
| rectal | 222 | 190 | 0.94 | 0.79 to 1.11 |      |  |  |  |

**Localisation of metastatic disease**

|                   |     |     |      |              |                  |      |              |                  |
|-------------------|-----|-----|------|--------------|------------------|------|--------------|------------------|
| intra-abdominal   | 860 | 723 | 1    | Ref          | <b>&lt;0.001</b> | 1    | Ref          | <b>&lt;0.001</b> |
| intra-thoracic    | 63  | 55  | 0.88 | 0.73 to 1.32 |                  | 0.92 | 0.67 to 1.25 |                  |
| thoraco-abdominal | 214 | 204 | 1.57 | 1.33 to 1.85 |                  | 1.58 | 1.33 to 1.88 |                  |

**Number of metastatic site**

|          |     |     |      |              |                  |  |  |  |
|----------|-----|-----|------|--------------|------------------|--|--|--|
| unique   | 819 | 677 | 1    | Ref          | <b>&lt;0.001</b> |  |  |  |
| multiple | 340 | 324 | 1.95 | 1.69 to 2.24 |                  |  |  |  |

**EDI quintile**

|       |     |     |      |              |      |  |  |  |
|-------|-----|-----|------|--------------|------|--|--|--|
| 1.2   | 573 | 501 | 1    | Ref          | 0.91 |  |  |  |
| 3.4.5 | 582 | 496 | 1.01 | 0.88 to 1.15 |      |  |  |  |

---

Groupe 1 : No treatment or only RT

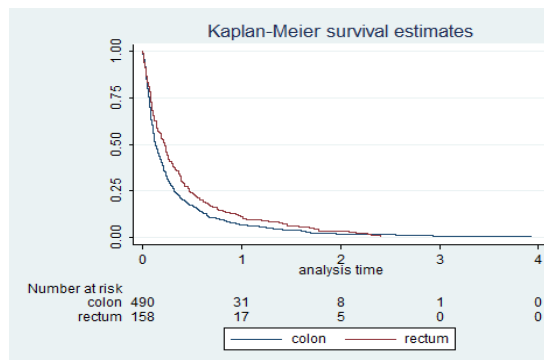

Groupe 2 : only CT or CT +RT

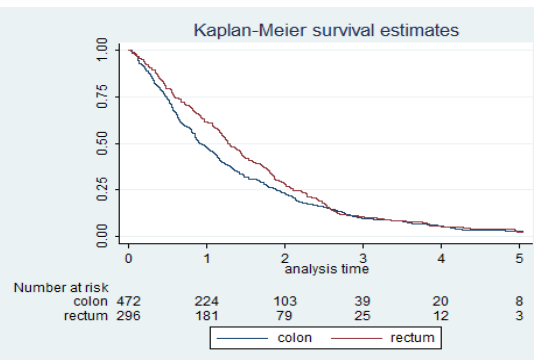

Groupe 3 : Only PTR or PTR + RT

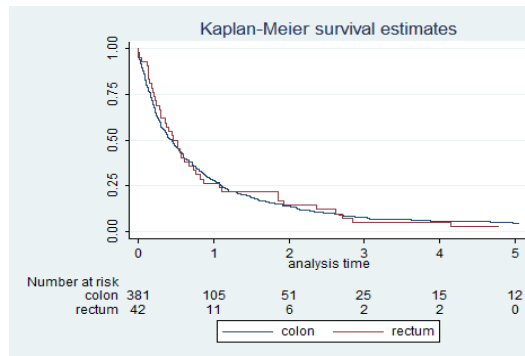

Groupe 4 : PTR + CT or PTR+ CT+ RT

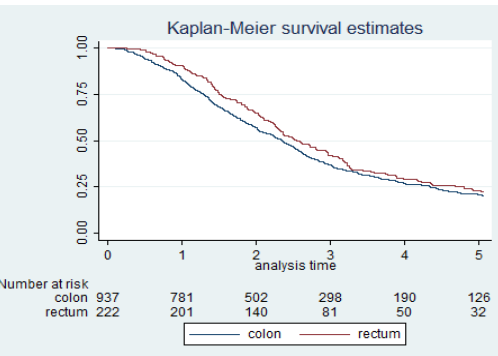

**Figure S1.** Kaplan-Meier Curves for each treatment groups according to sub-localisation (Colon Vs Rectum).
